# Supplementary material
Source: PubMed Central journal article supplement (PMC2753795)
Supplement: NIHMS135713-supplement-1.pdf [file NIHMS135713-supplement-1.pdf]

## E-ONLY APPENDIX

**Appendix 1. Mean unadjusted neuropsychological subtest scores at study follow-up points by group.**

| Cognitive Test                  | Group | Baseline    | # pts | 12 months   | # pts | 72 months   | #    |
|---------------------------------|-------|-------------|-------|-------------|-------|-------------|------|
|                                 |       | Mean (SD)   |       | Mean (SD)   |       | Mean (SD)   | pts. |
| <b>RAVLT –</b>                  | CABG  | 39.1 (8.8)  | n=152 | 44.6(10.6)  | n=124 | 39.4 (10.4) | n=96 |
| <b>Total score <sup>a</sup></b> | OPCAB | 38.5 (9.2)  | n=72  | 42.3 (10.3) | n=55  | 40.0 (11.2) | n=43 |
|                                 | NSCC  | 41.2 (8.8)  | n=99  | 45.5 (10.4) | n=91  | 42.9 (11.6) | n=67 |
|                                 | HHC   | 45.8 (9.4)  | n=69  | 50.1 (11.8) | n=67  | 47.8 (11.7) | n=60 |
| <b>RAVLT –</b>                  | CABG  | 7.1 (3.2)   | n=152 | 8.7 (3.4)   | n=124 | 7.0 (3.4)   | n=96 |
| <b>Trial 8 <sup>a</sup></b>     | OPCAB | 7.1 (3.3)   | n=71  | 8.5 (3.1)   | n=55  | 8.1 (3.0)   | n=43 |
|                                 | NSCC  | 7.8 (3.1)   | n=99  | 8.9 (3.5)   | n=91  | 8.2 (3.8)   | n=67 |
|                                 | HHC   | 9.0 (3.7)   | n=69  | 10.4 (3.6)  | n=67  | 9.8 (3.5)   | n=60 |
| <b>RAVLT –</b>                  | CABG  | 70.3 (25.5) | n=152 | 79.6 (23.7) | n=124 | 70.0 (26.1) | n=96 |
| <b>Retention <sup>a</sup></b>   | OPCAB | 69.8 (25.2) | n=71  | 83.5 (26.1) | n=55  | 84.5 (27.6) | n=43 |
|                                 | NSCC  | 76.6 (23.1) | n=99  | 80.3 (23.6) | n=91  | 77.8 (28.1) | n=67 |
|                                 | HHC   | 76.2 (23.7) | n=69  | 86.1 (22.2) | n=67  | 84.6 (23.2) | n=60 |
| <b>RAVLT –</b>                  | CABG  | 9.6 (3.7)   | n=151 | 10.7 (3.5)  | n=124 | 9.1 (4.4)   | n=95 |
| <b>Recognition <sup>a</sup></b> | OPCAB | 9.5 (4.1)   | n=72  | 10.4 (3.2)  | n=55  | 10.4 (3.7)  | n=43 |
|                                 | NSCC  | 10.1 (3.7)  | n=99  | 10.7 (3.9)  | n=91  | 9.5 (5.8)   | n=67 |
|                                 | HHC   | 10.9 (3.6)  | n=69  | 11.7 (2.8)  | n=67  | 11.1 (3.8)  | n=60 |
| <b>RCF –</b>                    | CABG  | 50.2 (19.1) | n=152 | 58.0 (20.2) | n=123 | 50.4 (21.5) | n=94 |

|                                        |       |              |       |             |       |              |      |
|----------------------------------------|-------|--------------|-------|-------------|-------|--------------|------|
| <b>retention<sup>b</sup></b>           | OPCAB | 45.6 (21.8)  | n=71  | 60.0 (20.2) | n=55  | 53.0 (21.0)  | n=43 |
|                                        | NSCC  | 48.8 (18.1)  | n=99  | 54.7 (20.4) | n=91  | 51.2 (22.6)  | n=65 |
|                                        | HHC   | 55.3 (18.1)  | n=69  | 65.7 (16.1) | n=67  | 58.9 (19.4)  | n=60 |
| <b>RCF –</b>                           | CABG  | 16.6 (7.0)   | n=152 | 19.5 (7.4)  | n=123 | 16.1 (7.7)   | n=94 |
| <b>delayed recall<sup>b</sup></b>      | OPCAB | 15.4 (7.9)   | n=71  | 20.3 (7.5)  | n=55  | 17.7 (7.7)   | n=43 |
|                                        | NSCC  | 16.4 (6.8)   | n=99  | 18.4 (7.6)  | n=91  | 16.7 (8.0)   | n=65 |
|                                        | HHC   | 18.8 (6.7)   | n=69  | 22.1 (6.3)  | n=67  | 20.0 (7.2)   | n=60 |
| <b>RCF – copy<sup>c</sup></b>          | CABG  | 32.5 (4.7)   | n=152 | 33.1 (3.6)  | n=124 | 31.4 (5.2)   | n=94 |
|                                        | OPCAB | 32.6 (4.0)   | n=71  | 33.4 (3.4)  | n=55  | 32.5 (3.9)   | n=43 |
|                                        | NSCC  | 33.0 (3.2)   | n=99  | 33.0 (3.4)  | n=91  | 32.4 (3.4)   | n=65 |
|                                        | HHC   | 33.8 (3.0)   | n=69  | 33.4 (3.7)  | n=67  | 33.7 (2.3)   | n=60 |
| <b>Block design<sup>c</sup></b>        | CABG  | 23.2 (10.0)  | n=150 | 26.2 (10.2) | n=123 | 23.3 (10.2)  | n=93 |
|                                        | OPCAB | 22.9 (9.2)   | n=69  | 26.0 (9.6)  | n=54  | 25.0 (10.3)  | n=43 |
|                                        | NSCC  | 23.2 (9.5)   | n=99  | 24.2 (9.6)  | n=91  | 23.3 (9.8)   | n=66 |
|                                        | HHC   | 27.8 (9.8)   | n=69  | 28.4(9.6)   | n=67  | 28.6 (9.3)   | n=60 |
| <b>Boston Naming</b>                   | CABG  | 26.2 (3.7)   | n=152 | 27.1 (2.9)  | n=124 | 25.9 (4.0)   | n=95 |
| <b>Test<sup>d</sup></b>                | OPCAB | 26.0 (3.7)   | n=71  | 26.5 (3.7)  | n=55  | 26.3 (3.7)   | n=43 |
|                                        | NSCC  | 26.1 (3.6)   | n=99  | 26.7 (3.3)  | n=91  | 26.5 (3.0)   | n=67 |
|                                        | HHC   | 27.1 (2.8)   | n=69  | 27.6 (2.3)  | n=67  | 27.5 (2.7)   | n=60 |
| <b>GP- Dominant hand<sup>e/i</sup></b> | CABG  | 107.5 (53.7) | n=152 | 95.6 (29.9) | n=122 | 105.5 (36.0) | n=93 |
|                                        | OPCAB | 99.6 (30.9)  | n=67  | 94.2 (32.1) | n=54  | 96.0 (34.4)  | n=43 |
|                                        | NSCC  | 97.9 (29.7)  | n=99  | 90.8 (24.6) | n=91  | 103.3 (42.0) | n=67 |
|                                        | HHC   | 82.7 (23.2)  | n=69  | 79.6 (23.1) | n=66  | 82.8 (30.0)  | n=58 |

|                                                |       |              |       |             |       |              |      |
|------------------------------------------------|-------|--------------|-------|-------------|-------|--------------|------|
| <b>GP- Non-dominant hand</b> <sup>e/i</sup>    | CABG  | 119.1 (65.3) | n=149 | 103.4(30.6) | n=123 | 116.3 (41.3) | n=94 |
|                                                | OPCAB | 107.0 (34.4) | n=68  | 98.1 (30.3) | n=54  | 99.0 (30.4)  | n=43 |
|                                                | NSCC  | 107.4 (38.4) | n=98  | 102.5(35.6) | n=89  | 111.6 (42.9) | n=66 |
| <b>Trail Making Test-Part A</b> <sup>f/i</sup> | HHC   | 88.4 (30.5)  | n=69  | 86.2 (29.3) | n=67  | 88.3 (29.2)  | n=57 |
|                                                | CABG  | 47.1 (24.2)  | n=151 | 40.8 (16.8) | n=123 | 47.7 (29.5)  | n=95 |
|                                                | OPCAB | 48.0 (23.0)  | n=69  | 43.4 (17.5) | n=55  | 42.6 (15.9)  | n=43 |
| <b>Written Alphabet</b> <sup>f/i</sup>         | NSCC  | 43.1 (14.4)  | n=99  | 41.0 (15.6) | n=91  | 46.4 (31.6)  | n=67 |
|                                                | CABG  | 26.9 (21.6)  | n=149 | 27.0 (28.2) | n=123 | 26.2 (15.0)  | n=94 |
|                                                | OPCAB | 25.8 (13.9)  | n=72  | 30.1 (52.8) | n=55  | 26.8 (13.1)  | n=43 |
| <b>RAVLT – Trial 1</b> <sup>g</sup>            | NSCC  | 23.2 (10.8)  | n=99  | 23.6 (13.5) | n=90  | 21.9 (6.9)   | n=67 |
|                                                | CABG  | 5.0 (1.4)    | n=152 | 6.1 (2.1)   | n=124 | 5.3 (1.6)    | n=96 |
|                                                | OPCAB | 4.8 (1.6)    | n=72  | 5.5 (1.5)   | n=55  | 5.1 (1.6)    | n=43 |
| <b>Mini-Mental Exam attention</b> <sup>g</sup> | NSCC  | 5.4 (1.6)    | n=99  | 6.5 (2.1)   | n=91  | 6.1 (2.2)    | n=67 |
|                                                | CABG  | 4.0 (1.3)    | n=152 | 4.0 (1.0)   | n=124 | 4.0 (1.3)    | n=96 |
|                                                | OPCAB | 4.2 (1.1)    | n=72  | 4.0 (1.0)   | n=55  | 4.3 (1.0)    | n=43 |
| <b>Trail Making Test-Part B</b> <sup>h</sup>   | NSCC  | 4.2 (1.2)    | n=99  | 5.0 (1.0)   | n=91  | 4.3 (1.2)    | n=67 |
|                                                | CABG  | 4.4 (1.0)    | n=69  | 5.0 (1.0)   | n=67  | 4.4 (0.9)    | n=60 |
|                                                | OPCAB | 4.2 (1.1)    | n=72  | 4.0 (1.0)   | n=55  | 4.3 (1.0)    | n=43 |
| <b>Trail Making Test-Part B</b> <sup>h</sup>   | CABG  | 105.2 (59.0) | n=147 | 95.4 (48.2) | n=122 | 105.0 (50.1) | n=91 |
|                                                | OPCAB | 96.9 (34.7)  | n=68  | 97.2 (48.4) | n=55  | 101.1 (47.1) | n=43 |
|                                                | NSCC  | 95.4 (40.0)  | n=99  | 92.0 (41.5) | n=91  | 100.4 (50.6) | n=66 |

|                      |       |             |      |             |      |             |      |
|----------------------|-------|-------------|------|-------------|------|-------------|------|
|                      | HHC   | 75.5 (33.4) | n=68 | 72.9 (33.7) | n=67 | 74.6 (42.0) | n=60 |
| <b>Letter Number</b> | CABG  | -           | -    | -           | -    | 8.1 (3.5)   | n=94 |
| <b>Sequencing</b>    | OPCAB |             |      |             |      | 8.8 (2.0)   | n=43 |
|                      | NSCC  | -           | -    | -           | -    | 9.0 (2.4)   | n=61 |
|                      | HHC   |             |      |             |      | 9.8 (2.4)   | n=60 |

CABG = coronary artery bypass grafting; GP = Grooved Pegboard; HHC = heart healthy control; NSCC = non-surgical cardiac comparison; OPCAB = off-pump coronary artery bypass grafting; RAVLT = Rey Auditory Verbal Learning Test; RCF = Rey Complex Figure

<sup>a</sup> Verbal Memory domain

<sup>b</sup> Visual Memory domain

<sup>c</sup> Visuoconstruction domain

<sup>d</sup> Language domain

<sup>e</sup> Motor Speed domain (scores truncated at 240 seconds)

<sup>f</sup> Psychomotor Speed domain (Trail-Making scores truncated at 240 seconds)

<sup>g</sup> Attention domain

<sup>h</sup> Executive Function domain (scores truncated at 240 seconds)

<sup>i</sup> this is a timed test, data shown is time in seconds.

## Appendix 2. (Supplemental, e-only)

## Within group comparison of differences in change scores from baseline to 72 months

| Cognitive Domain   | HHC                                |                 | CABG                                  |                 | OPCAB                  |         | NSCC                                  |                 |
|--------------------|------------------------------------|-----------------|---------------------------------------|-----------------|------------------------|---------|---------------------------------------|-----------------|
|                    | Difference (95% CI)                | p-value         | Difference (95% CI)                   | p-value         | Difference (95% CI)    | p-value | Difference (95% CI)                   | p-value         |
| Verbal memory      | 0.18<br>(-0.02, 0.39)              | 0.08            | -0.05<br>(-0.20, 0.10)                | 0.49            | 0.15<br>(-0.01, 0.30)  | 0.07    | -0.06<br>(-0.28, 0.17)                | 0.63            |
| Visual memory      | <b>0.22</b><br><b>(0.03, 0.42)</b> | <b>0.03</b>     | -0.11<br>(-0.28, 0.06)                | 0.20            | 0.20<br>(-0.02, 0.41)  | 0.07    | -0.16<br>(-0.43, 0.11)                | 0.25            |
| Visuoconstruction  | -0.01<br>(-0.13, 0.13)             | 0.98            | <b>-0.29</b><br><b>(-0.43, -0.15)</b> | <b>&lt;0.01</b> | -0.01<br>(-0.15, 0.16) | 0.98    | <b>-0.29</b><br><b>(-0.46, -0.12)</b> | <b>&lt;0.01</b> |
| Language           | 0.10<br>(-0.08, 0.27)              | 0.29            | -0.18<br>(-0.38, 0.02)                | 0.08            | -0.20<br>(-0.45, 0.04) | 0.11    | -0.11<br>(-0.29, 0.07)                | 0.23            |
| Motor Speed        | 0.04<br>(-0.17, 0.25)              | 0.72            | -0.16<br>(-0.32, 0.01)                | 0.06            | 0.04<br>(-0.18, 0.25)  | 0.75    | <b>-0.37</b><br><b>(-0.59, -0.14)</b> | <b>&lt;0.01</b> |
| Psychomotor speed  | 0.11<br>(-0.05, 0.26)              | 0.18            | -0.09<br>(-0.22, 0.04)                | 0.18            | -0.04<br>(-0.21, 0.12) | 0.61    | -0.01<br>(-0.17, 0.16)                | 0.98            |
| Attention          | <b>0.34</b><br><b>(0.12, 0.57)</b> | <b>&lt;0.01</b> | 0.14<br>(-0.08, 0.37)                 | 0.22            | -0.01<br>(-0.21, 0.21) | 0.99    | 0.22<br>(-0.06, 0.50)                 | 0.12            |
| Executive function | 0.20<br>(-0.05, 0.45)              | 0.11            | <b>-0.19</b><br><b>(-0.34, -</b>      | <b>0.02</b>     | -0.01<br>(-0.18, 0.16) | 0.87    | -0.10<br>(-0.29, 0.09)                | 0.32            |

|        |              |             |              |             |               |      |               |      |
|--------|--------------|-------------|--------------|-------------|---------------|------|---------------|------|
|        |              |             | <b>0.03)</b> |             |               |      |               |      |
| Global | <b>0.15</b>  | <b>0.01</b> | <b>-0.10</b> | <b>0.03</b> | 0.05          | 0.35 | -0.10         | 0.19 |
|        | (0.03, 0.28) |             | (-0.19, -    |             | (-0.05, 0.15) |      | (-0.25, 0.05) |      |
|        |              |             | <b>0.01)</b> |             |               |      |               |      |

---

CABG = coronary artery bypass grafting; CI = confidence intervals; HHC = heart healthy comparison;

NSCC = nonsurgical cardiac comparison; OPCAB = off-pump coronary artery bypass

ACCEPTED MANUSCRIPT

## Appendix 3. (Supplemental, e-only)

## Within group comparison of differences in change scores from 12 months to 72 months (late decline)

| Cognitive Domain  | HHC                            |                 | CABG                           |                 | OPCAB                          |                 | NSCC                           |                 |
|-------------------|--------------------------------|-----------------|--------------------------------|-----------------|--------------------------------|-----------------|--------------------------------|-----------------|
|                   | Difference (95% CI)            | <i>p</i> -value |
| Verbal memory     | <b>-0.26</b><br>(-0.46, -0.06) | <b>0.01</b>     | <b>-0.53</b><br>(-0.67, -0.40) | <b>&lt;0.01</b> | <b>-0.19</b><br>(-0.35, -0.04) | <b>0.01</b>     | <b>-0.37</b><br>(-0.61, -0.14) | <b>&lt;0.01</b> |
| Visual memory     | <b>-0.35</b><br>(-0.54, -0.16) | <b>&lt;0.01</b> | <b>-0.47</b><br>(-0.62, -0.32) | <b>&lt;0.01</b> | <b>-0.43</b><br>(-0.60, -0.26) | <b>&lt;0.01</b> | <b>-0.45</b><br>(-0.69, -0.22) | <b>&lt;0.01</b> |
| Visuoconstruction | -0.01<br>(-0.14, 0.11)         | 0.85            | <b>-0.44</b><br>(-0.60, -0.28) | <b>&lt;0.01</b> | <b>-0.19</b><br>(-0.36, -0.03) | <b>0.02</b>     | <b>-0.34</b><br>(-0.50, -0.18) | <b>&lt;0.01</b> |
| Language          | -0.09<br>(-0.27, 0.09)         | 0.32            | <b>-0.38</b><br>(-0.55, -0.20) | <b>&lt;0.01</b> | <b>-0.30</b><br>(-0.48, -0.11) | <b>&lt;0.01</b> | <b>-0.28</b><br>(-0.44, -0.12) | <b>&lt;0.01</b> |
| Motor Speed       | <b>-0.21</b><br>(-0.39, -0.04) | <b>0.02</b>     | <b>-0.44</b><br>(-0.58, -0.29) | <b>&lt;0.01</b> | -0.16<br>(-0.35, 0.02)         | 0.08            | <b>-0.66</b><br>(-0.86, -0.46) | <b>&lt;0.01</b> |
| Psychomotor speed | -0.05<br>(-0.20, 0.09)         | 0.48            | <b>-0.18</b><br>(-0.30, -0.06) | <b>0.01</b>     | -0.13<br>(-0.28, 0.03)         | 0.10            | -0.08<br>(-0.23, 0.06)         | 0.26            |

|           |                 |                 |              |                 |               |                 |              |                 |
|-----------|-----------------|-----------------|--------------|-----------------|---------------|-----------------|--------------|-----------------|
|           |                 |                 | 0.05)        |                 |               |                 |              |                 |
| Attention | <b>-0.34</b>    | <b>0.02</b>     | <b>-0.41</b> | <b>&lt;0.01</b> | <b>-0.28</b>  | <b>0.01</b>     | <b>-0.38</b> | <b>&lt;0.01</b> |
|           | (-0.62, -       |                 | (-0.62, -    |                 | (-0.48, -     |                 | (-0.63, -    |                 |
|           | <b>0.06)</b>    |                 | <b>0.20)</b> |                 | <b>0.08)</b>  |                 | <b>0.12)</b> |                 |
| Executive | <b>&lt;0.01</b> | <b>0.98</b>     | <b>-0.33</b> | <b>&lt;0.01</b> | <b>-0.15</b>  | <b>0.12</b>     | <b>-0.27</b> | <b>&lt;0.01</b> |
| function  | (-0.17, 0.18)   |                 | (-0.46, -    |                 | (-0.35, 0.04) |                 | (-0.46, -    |                 |
|           |                 |                 | <b>0.19)</b> |                 |               |                 | <b>0.09)</b> |                 |
| Global    | <b>-0.19</b>    | <b>&lt;0.01</b> | <b>-0.42</b> | <b>&lt;0.01</b> | <b>-0.23</b>  | <b>&lt;0.01</b> | <b>-0.37</b> | <b>&lt;0.01</b> |
|           | (-0.30, -       |                 | (-0.50, -    |                 | (-0.31, -     |                 | (-0.50, -    |                 |
|           | <b>0.08)</b>    |                 | <b>0.34)</b> |                 | <b>0.14)</b>  |                 | <b>0.23)</b> |                 |

CABG = coronary artery bypass grafting; CI = confidence intervals; HHC = heart healthy comparison;

NSSC = nonsurgical cardiac comparison; OPCAB = off-pump coronary artery bypass
